# Supplementary material for: Neutrophil Migration in the Activation of the Innate Immune Response to DifferentFlavobacterium psychrophilumVaccines in Zebrafish (Danio rerio)
Source: Hindawi journal article supplement (doi:10.1155/2015/515187), 2015-01-01

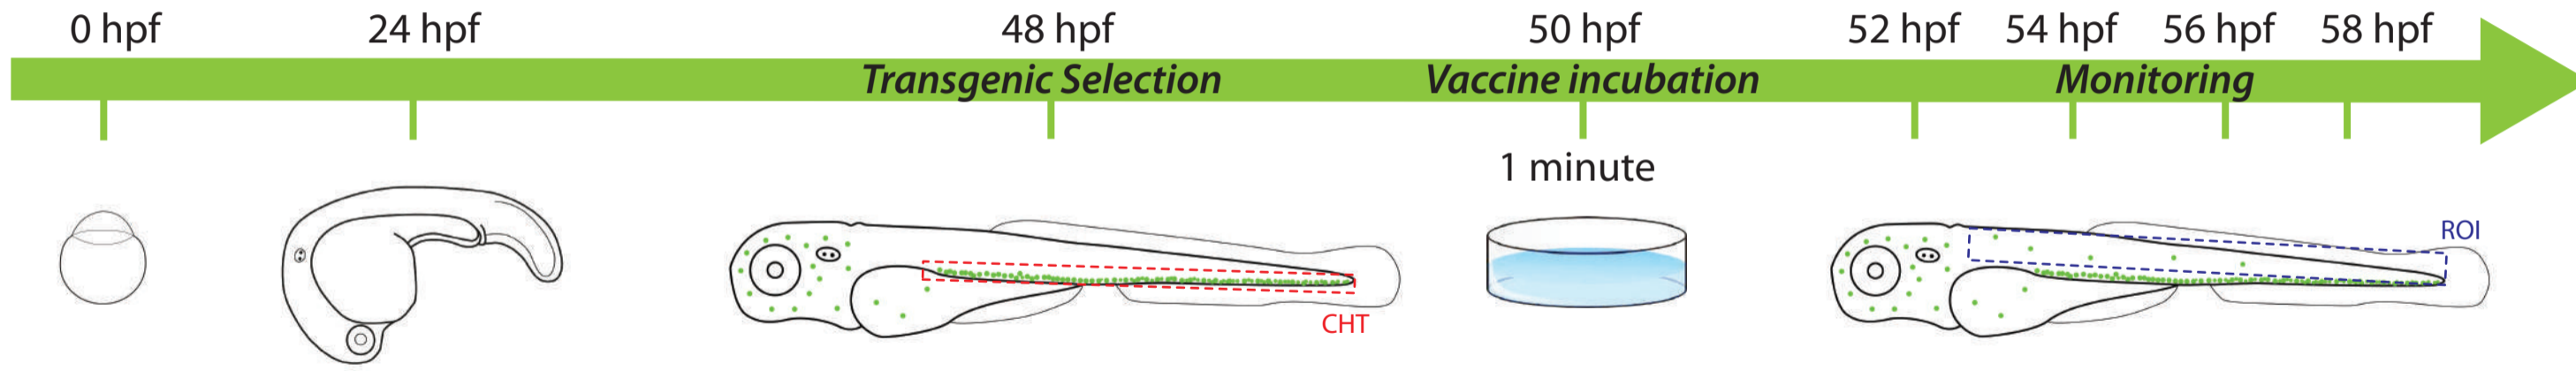

Supplement: f1 [file 515187.f1.pdf]
